# Supplementary material for: Microbial Membrane Tetraether lipid-inferred paleohydrology and paleotemperature of Lake Chenghai during the Pleistocene-Holocene transition
Source: Copernicus journal article supplement (doi:10.5194/cp-2019-82), 2019-08-27
Supplement: Supplementary file 1 [file cp-2019-82-supplement.pdf]

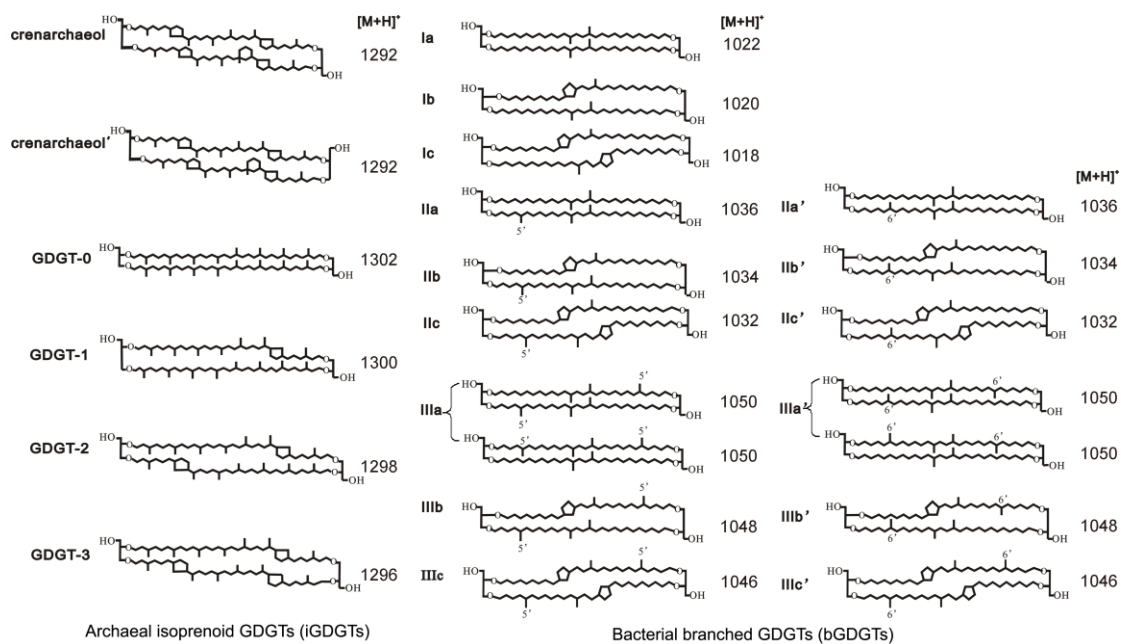

Fig. S1 The structures of isoprenoidal and branched GDGTs and their corresponding [M+H]<sup>+</sup> value (from Dang et al., 2016).

Dang, X.Y., Xue, J.T., Yang, H., Xie, S.C.: Environmental impacts on the distribution of microbial tetraether lipids in Chinese lakes with contrasting pH: Implications for lacustrine paleoenvironmental reconstructions. *Sci. China. Earth. Sci.* 59, 939-950, DOI:10.1007/s11430-015-5234-z, 2016.
