# Supplementary material for: Microbial Membrane Tetraether lipid-inferred paleohydrology and paleotemperature of Lake Chenghai during the Pleistocene-Holocene transition
Source: Copernicus journal article supplement (doi:10.5194/cp-2019-82), 2019-08-27
Supplement: Supplementary file [file cp-2019-82-RC1-supplement.pdf]

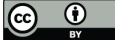

1 **Microbial Membrane Tetraether lipid-inferred paleohydrology and**  
2 **paleotemperature of Lake Chenghai during the Pleistocene-Holocene**  
3 **transition**

4 Weiwei Sun <sup>a</sup>, Enlou Zhang <sup>a,b,\*</sup>, Jie Chang <sup>a</sup>, James Shulmeister <sup>c,d</sup>, Michael I. Bird <sup>e</sup>,  
5 <sup>f</sup>, Cheng Zhao <sup>a,b</sup>, Qingfeng Jiang <sup>g</sup>, Ji Shen <sup>a</sup>

6 <sup>a</sup> State Key Laboratory of Lake Science and Environment, Nanjing Institute of  
7 Geography and Limnology, Chinese Academy of Sciences, Nanjing 210008, China

8 <sup>b</sup> Center for Excellence in Quaternary Science and Global Change, Chinese Academy  
9 of Science, Xian 710061, China

10 <sup>c</sup> School of Earth and Environmental Sciences, The University of Queensland, St  
11 Lucia, Brisbane, Qld, 4072, Australia

12 <sup>d</sup> School of Earth and Environment, University of Canterbury, Private Bag 4800,  
13 Christchurch, New Zealand

14 <sup>e</sup> ARC Centre of Excellence for Australian Biodiversity and Heritage, James Cook  
15 University, PO Box 6811, Cairns, Queensland, 4870, Australia

16 <sup>f</sup> College of Science and Engineering, James Cook University, PO Box 6811, Cairns,  
17 Queensland, 4870, Australia

18 <sup>g</sup> School of Geography Sciences, Nantong University, Nantong, 226007, China

19 \* Corresponding authors. [elzhang@niglas.ac.cn](mailto:elzhang@niglas.ac.cn). State Key Laboratory of Lake  
20 Science and Environment, Nanjing Institute of Geography and Limnology, Chinese  
21 Academy of Sciences, Nanjing 210008, China

22

23

24

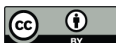

25 **ABSTRACT**

26 Over the past few decades, paleoenvironmental studies in the Indian Summer  
27 Monsoon (ISM) region have mainly focused on precipitation change, with few  
28 published terrestrial temperature records from the region. We analyzed the distribution  
29 of isoprenoid glycerol dialkyl glycerol tetraethers (isoGDGTs) in the sediments of  
30 Lake Chenghai in southwest China across the Pleistocene–Holocene transition, to  
31 extract both regional hydrological and temperature signals for this important transition  
32 period. Lake-level was reconstructed from the relative abundance of crenarchaeol in  
33 isoGDGTs (%cren) and the crenarchaeol'/crenarchaeol ratio. The %cren-inferred  
34 lake-level identified a single lowstand (15.4–14.4 cal ka BP), while the  
35 crenarchaeol'/crenarchaeol ratio suggests relatively lower lake-level between  
36 15.4–14.4 cal ka BP and 12.5–11.7 cal ka BP, corresponding to periods of weakened  
37 ISM during the Heinrich 1 (H1) and Younger Dryas (YD) cold event. A filtered  
38 TetraEther indeX consisting of 86 carbon atoms (TEX<sub>86</sub> index) revealed that lake  
39 surface temperature reached present-day values during the YD cold event, and  
40 suggests a substantial warming of ~4 °C from the early Holocene to the mid-Holocene.  
41 Our paleotemperature record is generally consistent with other records in southwest  
42 China, suggesting that the distribution of isoGDGTs in Lake Chenghai sediments has  
43 potential for quantitative paleotemperature reconstruction.

44

45 **Keywords:** Quantitative temperature reconstruction; Lake-level; TEX<sub>86</sub>; Isoprenoid  
46 GDGTs; Lacustrine sediment

47

48

49

50

51

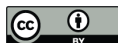

## 52 1. Introduction

53 Precipitation in the Indian summer monsoon (ISM) region has decreased  
54 substantially with recent global warming, greatly threatening ecosystem function,  
55 water availability and economic security across the region (Sinha et al., 2011; Sinha et  
56 al., 2015; Ljungqvist et al., 2016). For example, in 2009-2010 severe droughts  
57 occurred in southwest China that reduced food production dramatically (Lü et al.,  
58 2012). This has stimulated growing scientific interest in understanding the underlying  
59 forcing mechanisms behind climate variability in the ISM region on different  
60 time-scale, in order to better predict future monsoonal variations.

61 Over the past two decades, climate evolution in the ISM region since the Last  
62 Glacial Maximum has been reconstructed from various paleoclimatic archives,  
63 including stalagmites, marine and lacustrine sediments (Dykoski et al., 2005; Rashid  
64 et al., 2007; Govil and Divakar Naidu, 2011; Saraswat et al., 2013; Contreras-Rosales  
65 et al., 2014; Wang et al., 2014b; Dutt et al., 2015; Wu et al., 2015; Kathayat et al.,  
66 2016; Zhang et al., 2017a, 2017b; Li et al., 2018; Zhang et al., 2018; Sun et al., 2019;  
67 Zhang et al., 2019). ~~These studies provide evidence that changes in ISM precipitation~~  
68 ~~and temperature were generally synchronous on the orbital- and millennial-scale,~~ with  
69 a weakened ISM during cold events, and strengthened ISM during warm intervals.  
70 However, ~~there remains a paucity of~~ quantitative reconstructions of both hydrological  
71 and thermal parameters from the ISM region (Zhang et al., 2017a; Wu et al., 2018;  
72 Ning et al., 2019; Zhang et al., 2019), which hinders our detailed understanding of the  
73 dynamics of the ISM and ~~therefore~~ the development of climate models ~~with improved~~  
74 ~~prognostic potential.~~ 

75 Pollen, chironomids, alkenone and glycerol dialkyl glycerol tetraethers (GDGTs)  
76 have been widely used for the quantitative reconstruction of terrestrial  
77 paleotemperature during the Quaternary (Nakagawa et al., 2003, 2006; Blaga et al.,  
78 2013; Stebich et al., 2015; Wang et al., 2017b; Zhang et al., 2017a; Sun et al., 2018;  
79 Wu et al., 2018; Ning et al., 2019; Tian et al., 2019; Zhang et al., 2019). Isoprenoid  
80 GDGTs (isoGDGTs) are a suit of membrane lipids produced by some species.   




81 archaea, that are ubiquitous in soils, lacustrine and marine sediments (Schouten et al.,  
82 2013). The distribution of isoGDGTs compounds correlates well with surface water  
83 temperature, and therefore has great potential for use as a paleotemperature proxy  
84 (Schouten et al., 2002; Blaga et al., 2009; Kim et al., 2010; Powers et al., 2010).

85 The TetraEther indeX consisting of 86 carbon atoms (TEX<sub>86</sub> index), which  
86 represents the relative number of cyclopentane moieties in isoGDGT molecules  
87 derived from aquatic Thaumarchaeota, has also been successfully applied as a  
88 paleothermometer in large lakes (Tierney et al., 2008; Berke et al., 2012; Blaga et al.,  
89 2013; Wang et al., 2015). However, the index may not be a reliable proxy for past  
90 temperature in small lakes (Blaga et al., 2009; Powers et al., 2010; Sinninghe Damsté  
91 et al., 2012a). In addition, the proportion of crenarchaeol in isoGDGTs has been  
92 suggested to be a lake-level proxy due to a preference of the producer of this  
93 compound for a niche above the oxycline in the upper part of the water column in  
94 lacustrine systems (Wang et al., 2014a; Wang et al., 2017a; Wang et al., 2019). In this  
95 study, we present an isoGDGT record from Lake Chenghai in the southwest China.  
96 We use the results to test the reliability of isoGDGT-based proxies as lake-level and  
97 temperature indicators, by comparing our results with other paleoenvironmental  
98 records from adjacent areas.

99

## 100 2. Materials and methods

### 101 2.1. Regional setting

102 Lake Chenghai (26°27'-26°38'N, 100°38'-100°41'E, Fig. 1A) is a tectonic lake  
103 located in Yongsheng County in Yunnan Province (Wang and Dou, 1998). The present  
104 elevation of the lake-level is ~1500 m above sea level (a.s.l.), and the maximum depth  
105 is ~35 m with a mean depth of ~20 m. The lake has a surface area of ~77 km<sup>2</sup> with a  
106 catchment of ~318 km<sup>2</sup> (Wu et al., 2004). The annual mean lake surface temperature  
107 (LST) is ~16 °C (Wan et al., 2005). The lake water is slightly brackish (average=  
108 ~1‰) and alkaline (average pH= ~8). There are no perennial inlets or outflow streams



109 at present, and the lake is mainly maintained by direct precipitation and groundwater  
110 (Wan et al., 2005). Lake Chenghai was linked to the Jinsha River via the Haikou  
111 River ~~during the Ming Dynasty (1368-1644 CE)~~, but became a closed lake in the  
112 1690s CE when a dam (~1540 m a.s.l.) was constructed on its southern side (Wang  
113 and Dou, 1998).

114 The lake basin is surrounded by mountains ranging ~~from~~ 2300-4000 m a.s.l.  
115 Topsoil types include lateritic red earths and mountain red brown soils (Wang and  
116 Dou, 1998). The region is mainly affected by a warm-humid monsoonal airflow from  
117 the tropical Indian Ocean from June to September, and by the southern branch of the  
118 Northern Hemisphere westerly jet between October and May (Wang and Dou, 1998).  
119 Observed climatic data spanning the past 30 years from the Yongsheng meteorological  
120 station (26.68°N, 100.75°E; elevation of 2130 m a.s.l.) indicate a mean annual  
121 temperature of 14 °C, an annual precipitation of 660 mm, ~80% of which falls ~~from~~  
122 June ~~to~~ September.

## 123 2.2. Sampling and dating

124 An 874-cm-long sediment core was retrieved at 26°33'29.4"N, 100°39'6.7"E  
125 using a UWITEC coring platform system with a percussion corer in July 2016 ~~CE~~.  
126 The water depth was 30 m. ~~The sediment cores were~~ split longitudinally,  
127 photographed and ~~then~~ sectioned at a 1-cm interval in the laboratory, ~~and~~  
128 stored at 4 °C until analysis.

129 The chronology was established using accelerator mass spectrometry (AMS) <sup>14</sup>C  
130 dating of terrestrial plant macrofossils and charcoal (Sun et al., 2019). Macrofossils of  
131 leaves, woody stems and charcoal were hand-picked under the microscope. Eight  
132 dates covering the period from the last deglaciation to early Holocene were obtained.  
133 The analyses were performed at the Beta Analytic Radiocarbon Dating Laboratory in  
134 Miami, USA. The age model was developed utilizing Bacon, implemented in R 3.1.0  
135 at 5-cm intervals (Blaauw and Andres Christen, 2011; R Development Core Team,  
136 2013). All AMS <sup>14</sup>C dates were calibrated to calendar years before present (0 BP



137 =1950 CE) using the program Calib 7.1 and the IntCal13 calibration data set (Reimer  
138 et al., 2013). The basal mean weighted age is ~15.6 cal ka BP (Fig. 2, Sun et al.,  
139 2019).

### 140 2.3. Lipid extraction and analysis

141 After freeze-drying, a total of 102 samples at 4-cm interval over the  
142 Pleistocene-Holocene transition were collected for GDGT analysis, and this was  
143 increased to 1-cm resolution across 792-806 cm span due to the low sedimentation  
144 rate over this interval. A ~4 g aliquot of each sample was extracted ultrasonically (4  
145 times) with a mixture of dichloromethane and methanol (9:1, v/v). The supernatants  
146 were condensed and base hydrolyzed in a 1 M KOH/methanol solution. The neutral  
147 fractions were then separated into apolar and polar fractions on a silica gel column,  
148 using *n*-hexane and methanol, respectively. The polar fraction containing the GDGTs  
149 was concentrated and filtered through 0.45 µm polytetrafluoroethylene syringe filters  
150 using *n*-hexane/ isopropanol (99:1 v/v). These fractions were then dried in N<sub>2</sub> and  
151 stored at -20 °C until further analysis.

152 GDGTs were analyzed using an Agilent 1200 series high performance liquid  
153 chromatography-atmospheric pressure chemical ionization-mass spectrometer  
154 (HPLC- APCI- MS), following the procedure of Yang et al. (2015) at the Institute of  
155 Tibetan Plateau Research, Chinese Academy of Sciences. Briefly, the GDGTs were  
156 separated using three silica columns in tandem (150 mm× 2.1 mm, 1.9 µm; Thermo  
157 Finnigan, U.S.A.), maintained at 40 °C. The elution gradients were 84% *n*-hexane (A):  
158 16% ethyl acetate for 5 min, 84/16 to 82/18 A/B for another 60 min, then to 100% B  
159 for 21 min and kept for 4 min, followed by a return to 84/16 A/B for 30 min. The total  
160 flow rate of pump A and pump B was maintained at 0.1 ml/min. The APCI-MS  
161 conditions were: vaporizer pressure 60 psi, vaporizer temperature 400 °C, drying gas  
162 flow 6 L/min and temperature 200 °C, capillary voltage 3500 V and corona current 5  
163 µA (~3200 V). Selected ion monitoring (SIM) mode was performed to target specific  
164 *m/z* values for each GDGT compound, including 1302 (GDGT-0), 1300 (GDGT-1),  
165 1298 (GDGT-2), 1296 (GDGT-3), 1294 (crenarchaeol), 1292 (crenarchaeol'), 1050



166 (IIIa, IIIa'), 1048 (IIIb, IIIb'), 1046 (IIIc, IIIc'), 1036 (IIa, IIa'), 1034 (IIb, IIb'), 1032  
167 (IIc, IIc'), 1022 (Ia), 1020 (Ib) and 1018 (Ic). The chemical structures of these  
168 compounds are presented in Supplementary Fig. S1. The results are presented as the  
169 fractional of the sum of the isoGDGTs or the sum of the branched GDGTs (brGDGTs),  
170 based on the integration of the peak areas of the [M+H]<sup>+</sup> ions.

#### 171 2.4. Index calculation and temperature reconstruction

172 The percentage of each isoGDGT (X) was calculated according to the following  
173 equation:

$$174 \quad \%X = \frac{X}{(\text{GDGT-0} + \text{GDGT-1} + \text{GDGT-2} + \text{GDGT-3} + \text{crenarchaeol} + \text{crenarchaeol}')} \quad (1)$$

176 The TEX<sub>86</sub> index was defined by Schouten et al. (2002) as follows:

$$177 \quad \text{TEX}_{86} = \frac{(\text{GDGT-2} + \text{GDGT-3} + \text{crenarchaeol}')}{(\text{GDGT-1} + \text{GDGT-2} + \text{GDGT-3} + \text{crenarchaeol}')} \quad (2)$$

179 TEX<sub>86</sub>-inferred LST was calculated using the global lake calibration of  
180 Castañeda and Schouten (2015):

$$181 \quad \text{LST} = 49.03 \times \text{TEX}_{86} - 10.99 \quad (r^2 = 0.88, n=16, \text{RMSE} = 3.1 \text{ } ^\circ\text{C}) \quad (3)$$

182 The ratio of branched to isoprenoid tetraethers (BIT index), used as an indicator  
183 of soil organic matter input and as a test of the utility of the TEX<sub>86</sub> paleotemperature  
184 proxy, was calculated following Hopmans et al. (2004):

$$185 \quad \text{BIT} = \frac{(\text{Ia} + \text{IIa} + \text{IIa}' + \text{IIIa} + \text{IIIa}')}{(\text{Ia} + \text{IIa} + \text{IIa}' + \text{IIIa} + \text{IIIa}' + \text{crenarchaeol})} \quad (4)$$

187

### 188 3. Results

189 A wide variety of isoGDGT compositions is present in the sediments of Lake  
190 Chenghai. As illustrated in Fig. 3, the relative abundances of crenarchaeol (%cren)  
191 ranged from 2.4-61.3% with a mean of 52.4%. The %cren values were relatively low



192 and highly variable during 15.4-14.4 cal ka BP, ranging from 1.8-32.0%, with a mean  
193 of 11.6%. By contrast, the values were relatively stable during 14.4-7.0 cal ka BP,  
194 ranging from 41.8-61.3% with a mean of 58.3%. The relative abundances of its  
195 regioisomer, crenarchaeol', had a mean of 1.7%. The ratios of  
196 crenarchaeol'/crenarchaeol were highly variable during 15.4-14.4 cal ka BP with a  
197 mean of 0.07. After this time, the values gradually decrease during 14.4-11.7 cal ka  
198 BP with a minor reversal during 12.5-11.7 cal ka BP, where the ratio averaged 0.05.  
199 The crenarchaeol'/crenarchaeol ratios were generally stable and fluctuated around  
200 0.03 during the period 11.8-7.0 cal ka BP.

201 The relative abundances of GDGT-0 (%GDGT-0) showed a significant negative  
202 correlation with the reciprocal of %cren ( $r^2 = 0.98$ ,  $p < 0.001$ ). The %GDGT-0 values  
203 had a mean of 74.0% during 15.4-14.4 cal ka BP and a mean of 19.6% during the  
204 14.4-7.0 cal ka BP interval. The ratios of GDGT-0/crenarchaeol were generally  $>2$   
205 during the period 15.4-14.4 cal ka BP, ranging from 1.4-49.9 with a mean of 16.7, and  
206 all  $<2$  from 14.4-7.0 cal ka BP. The relative abundance of GDGT-1, GDGD-2 and  
207 GDGT-3 were generally low in the sediments, with a mean of 8.9, 9.2, and 1.3,  
208 respectively.

209 The  $\text{TEX}_{86}$  values were also highly variable during 15.4-14.4 cal ka BP period,  
210 ranging from 0.36-0.68 with a mean of 0.54. Thereafter the values generally followed  
211 an increasing trend, ranging from 0.49-0.63 with a mean of 0.58. The BIT values  
212 exhibited a significant negative correlation with cren% values ( $r^2 = 0.94$ ,  $p < 0.001$ ),  
213 ranging from 0.39-0.99 with a mean of 0.54. An abrupt decrease from 0.96 to 0.52  
214 occurred at 14.4 cal ka BP. After this time, the BIT values gradually decreased to a  
215 minimum value at 9.3 cal ka BP, and fluctuated thereafter around 0.48 during 9.3-7.0  
216 cal ka BP.

217

#### 218 4. Discussion

219 4.1. Environmental significances of the isoGDGT-based proxies

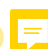





220 Crenarchaeol and its regioisomer are considered to be produced specifically by  
221 mesophilic Thaumarchaeota in aquatic environments (Schouten et al., 2002; Schouten  
222 et al., 2013). In marine conditions, Thaumarchaeota have a physiological mechanism  
223 to increase the weighted average number of cyclopentane rings in their membrane  
224 lipids with growth temperature, thus a significant linear correlation is found between  
225  $TEX_{86}$  values and mean annual sea surface temperature (Schouten et al., 2002). In the  
226 studies of lacustrine systems, the temperature calibration of  $TEX_{86}$  has been found to  
227 be nearly identical to the marine calibration, suggesting that the paleothermometer can  
228 also be applied in lacustrine sediments (Powers et al., 2004; Blaga et al., 2009;  
229 Powers et al., 2010; Castañeda and Schouten, 2011). In addition, aquatic  
230 Thaumarchaeota are nitrifiers, that prefer to live above the oxycline of relatively deep  
231 lakes, as has been observed by a range of lipid biomarker and DNA based  
232 investigations of vertical changes in archaea communities in lake water columns  
233 (Sinninghe Damsté et al., 2009; Blaga et al., 2011; Schouten et al., 2012; Buckles et  
234 al., 2013; Meegan Kumar et al., 2019).

235 Some Thaumarchaeota are considered to be suppressed by a high light level,  
236 which consequently might also prohibit them from thriving right near the surface  
237 layer of lake water (Schouten et al., 2013). In addition, Thaumarchaeota are  
238 chemoautotrophic and thrive predominantly near the oxycline in stratified lakes,  
239 mainly due to the release of ammonia derived from descending particulate organic  
240 matter that is recycled primarily by photoautotrophs or heterotrophs in the photic zone  
241 (Tierney et al., 2010). Furthermore, mixing of the water column will be much more  
242 frequent at lowstand conditions (Filippi and Talbot, 2005), and therefore periodically  
243 or permanently oxic, high nutrient availability water and enhanced nitrogen cycling  
244 would be likely result in a relatively lower production of crenarchaeol. Therefore, the  
245 cren% value measure in lacustrine sediments has been proposed to be a potential  
246 proxy for lake level change, with high values indicating highstand and deep lake  
247 status, while low values reflecting lowstand and shallow lake status (Wang et al.,  
248 2014a; Wang et al., 2017a; Wang et al., 2019).



249 Although  $\text{TEX}_{86}$  and  $\text{cren}\%$  show great potential as paleotemperature and  
250 paleo-lake-level proxies, they may be significantly biased when a substantial amount  
251 of soil and/or methanogenic archaea isoGDGTs are identified in the same lacustrine  
252 sediment (Weijers et al., 2006; Blaga et al., 2009; Powers et al., 2010; Wang et al.,  
253 2019). BIT index values are generally  $>0.90$  in soils, whereas values are close to zero  
254 for large lake sediments (Hopmans et al., 2004; Weijers et al., 2006). ~~In this study,~~  
255 ~~Lake Chenghai sediment the BIT index values range from~~ 0.39-0.99, indicating that a  
256 considerable proportion of isoGDGTs could derive from soils. However, recent  
257 studies ~~of modern processes~~ in a wide variety of lakes have suggested that at least  
258 ~~partly~~ branched GDGTs ~~are generated by in-situ production~~ (Blaga et al., 2010;  
259 Tierney et al., 2010; Pearson et al., 2011; Hu et al., 2016; Dang et al., 2018; Russell et  
260 al., 2018). Therefore, *in-situ* production of branched GDGTs in Lake Chenghai cannot  
261 be fully excluded.

262 It has also been shown that crenarchaeol' is only present in low abundance in  
263 most Thaumarchaeota except for the group I.1b Thaumarchaeota, where it is one of  
264 the major GDGTs (Kim et al., 2012; Sinninghe Damsté et al., 2012b). The  
265 crenarchaeol'/crenarchaeol ratios for enrichment cultures of group I.1a aquatic  
266 Thaumarchaeota are typically 0.01-0.04, however, for group I.1b Thaumarchaeota  
267 enriched from soils the crenarchaeol'/crenarchaeol ratios are around 0.21 and  
268 substantially higher (Pitcher et al., 2011; Sinninghe Damsté et al., 2012a). This  
269 suggests that the observed down-core changes in crenarchaeol'/crenarchaeol ratios  
270 may be due to relatively high contributions of group I.1b Thaumarchaeota from soils  
271 during 15.4-11.8 cal ka BP, and that these dominate the contributions of isoGDGTs  
272 derived from aquatic group I.1a Thaumarchaeota during the period from 11.8-7.0 cal  
273 ka BP.

274 The  $\text{TEX}_{86}$  and  $\text{cren}\%$  measures might also be affected by methanogenic and  
275 methanotrophic archaea because methanogenesis is the dominant anaerobic metabolic  
276 pathway in freshwater ecosystems (Blaga et al., 2009; Dang et al., 2016; Yao et al.,  
277 2019). Crenarchaeol and GDGT-0 can be derived from Group I Thaumarchaeota,

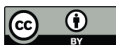

278 whereas methanogens synthesize GDGT-0, but no crenarchaeol. On this basis, the  
279 ratio of GDGT-0/crenarchaeol has been proposed to evaluate the influence of  
280 methanogenesis on the distribution of isoGDGTs in lacustrine sediments (Blaga et al.,  
281 2009). The ratio typically varies between 0.2 and 2 in group I Thaumarchaeota, thus a  
282 value >2 is generally thought to reflect a substantial contribution from methanogens  
283 to the total isoGDGT (Schouten et al., 2002; Blaga et al., 2009). Therefore, higher  
284 GDGT-0/crenarchaeol values suggest that methanogenic and methanotrophic archaeal  
285 were also likely to be an important source of GDGTs in some of Lake Chenghai  
286 sediments during 15.4-14.4 cal ka BP.

#### 287 4.2. Assessment of isoGDGT-based lake-level proxy

288 Environmental changes at Lake Chenghai as inferred from %cren,  
289 crenarchaeol/crenarchaeol ratio, the BIT index and GDGT-0/crenarchaeol ratio  
290 during the period from the last deglaciation to the early Holocene are illustrated in Fig.  
291 4. The relatively low %cren and high GDGT-0/crenarchaeol values during 15.4-14.4  
292 cal ka BP suggest that the Thaumarchaeota were mainly suppressed by methanogenic  
293 and methanotrophic archaeal. Deep lake conditions and thermal stratification have  
294 also been suggested as important in-influencing the Thaumarchaeota's growth, while  
295 any increase in water column turbulence would have negatively affected them  
296 (Tierney et al., 2010). Thus the abrupt increase in %cren values at 14.4 cal ka BP  
297 suggest a lowland of Lake Chenghai during 15.4-14.4 cal ka BP, and a highstand  
298 period thereafter.

299 The lowstand period is consistent in timing with the stable oxygen isotope ( $\delta^{18}\text{O}$ )  
300 record of authigenic carbonates derived from the same core (Fig. 4e, Sun et al., 2019),  
301 speleothem  $\delta^{18}\text{O}$  records from Mawmluh Cave and Bittoo Cave in north India (Fig. 4f,  
302 Dutt et al., 2015; Kathayat et al., 2016), and Donnge Cave in southwest China  
303 (Dykoski et al., 2005), which all record a substantial positive shift in  $\delta^{18}\text{O}$  values at  
304 that time. Speleothem  $\delta^{18}\text{O}$  records in the ISM region are used as a rainfall amount  
305 proxy, tracking changes in monsoon intensity (Dykoski et al., 2005; Cheng et al.,  
306 2012; Dutt et al., 2015). Therefore, the lowstand of Lake Chenghai during 15.4-14.4



307 cal ka BP implies a weakened ISM during the Heinrich 1 (H1) cold event, consistent  
308 with ~~other evidence~~.

309 Low lake-levels during the H1 cold event are also ~~indicated by~~ several previous  
310 paleolimnological studies from the Yunnan Plateau, within the uncertainties of the age  
311 model. **Diatom** and grain-size records from Lake Tengchongqinghai show a  
312 significant decrease in acidophilous diatom species and an increase in the grain-size  
313 of mineral particles from 18.5 to 15.0 cal ka BP, suggesting that the climate was ~~driest~~  
314 and the ISM was at its weakest since the last deglaciation (Fig. 4g, Zhang et al., 2017b;  
315 Li et al., 2018). Similarly, an increase in >30  $\mu\text{m}$  grain-size particles in the late glacial  
316 sediments from Lake Xingyun reflects a period of abrupt weak ISM during the H1  
317 cold event (Wu et al., 2015). In Lake Lugu, the loss of the planktonic diatoms and a  
318 switch to small *Fragilaria* spp. suggest a weaker stratification during 24.5-14.5 cal ka  
319 BP, which might also correspond to low lake-level at that time (Wang et al., 2014b).

320 **Lake Chenghai lake-level does** not seem to reduce during the **Younger Dryas**  
321 **(YD) cold event**, which is also recognized as a millennial-scale period of weak ISM  
322 (Dutt et al., 2015; Dykoski et al., 2005; Kathayat et al., 2016; Sun et al., 2019). In  
323 contrast, a low lake-level signal is observed in the  $\delta^{18}\text{O}$  record of authigenic  
324 carbonates from Lake Chenghai (Sun et al., 2019). In addition, increased lake water  
325 alkalinity and decreased lake-level are also recorded in the diatom and grain-size  
326 proxy records during 12.8-11.1 cal ka BP of Lake Tengchongqinghai (Fig. 4g, Zhang  
327 et al., 2017b; Li et al., 2018). **The differences in lake hydrological conditions to the**  
328 **YD weak ISM inferred from different lake sediment records is possibly due to**  
329 **differences in the sensitivity of the proxy to lake-level variation in the case of Lake**  
330 **Chenghai.**

331 The  $\delta^{18}\text{O}$  record of authigenic carbonates from Lake Chenghai and speleothem  
332  $\delta^{18}\text{O}$  records in the ISM region suggest that the weakening of the ISM during the YD  
333 was less marked than that occurring during the H1 event, in turn suggesting that  
334 lake-levels in southwest China may have been higher during the YD than the H1  
335 event (Dykoski et al., 2005; Dutt et al., 2015; Kathayat et al., 2016; Sun et al., 2019;

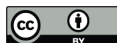

336 Zhang et al., 2019). For the %cren proxy, we note that the values are significantly  
337 correlated to the logarithm of depth in Asian lakes ( $\%cren = 19.59 \times \log(\text{depth}) + 9.23$ ),  
338 suggesting that %cren may be less sensitive to water depth variation when the  
339 lake-level is relatively high (Wang et al., 2019). It is also worth noting that the  
340 crenarchaeol'/crenarchaeol ratios were not only relatively higher during the H1 cold  
341 event, but also showed a minor reversal during the YD cold event. These results are  
342 consistent with group I.1b Thaumarchaeota being an important source of isoGDGTs  
343 in some small lakes and to the nearshore area of large lakes (Wang et al., 2019).

#### 344 *4.3. Warming in the early Holocene*

345 Robust application of the TEX<sub>86</sub>-based paleotemperature calibration critically  
346 depends on the assumption that the isoGDGTs used for calculation of TEX<sub>86</sub> values  
347 are mainly been derived from group I.1a in the water column (Blaga et al., 2009;  
348 Castañeda and Schouten, 2011; Powers et al., 2010; Sinninghe Damsté et al., 2012a).  
349 Since the influence of methanogenic archaea in the water column or archaea in the  
350 catchment soils have been recognized, Lake Chenghai sediments with BIT  
351 values >0.5 and/or GDGT-0/crenarchaeol ratio >2 are excluded from the discussion  
352 below (Powers et al., 2010; Castañeda and Schouten, 2015). 57 samples remain that  
353 have isoGDGT distributions consistent with their dominant source being the aquatic  
354 Thaumarchaeota, most of these being from the time interval between 11.7-8.2 cal ka  
355 BP, and only a few from the early YD period (n=2) and 8.2-7.0 cal ka BP (n= 6).  
356 Using Equation 4 developed by Castañeda and Schouten (2015) to calculate mean  
357 LST, yielded LST values from 15.7-20.1 °C, with a mean of 17.9 °C (Fig. 5a).

358 LST was ~15.8 °C during the early YD period, a temperature approaching the  
359 16 °C observed in the present Lake Chenghai. Following the YD cold event, LST  
360 rapidly increased from 16.2 °C at 11.2 cal ka BP to 18.2 °C at 11.0 cal ka BP, and LST  
361 ranged from 16.8 °C to 20.1 °C with a an increasing trend observed during the  
362 11.0-7.0 cal ka BP interval. This result is consistent with other recent reconstructed  
363 mean annual temperatures in southwest China, which show the temperatures during  
364 the YD cold event were generally similar to the present-day value, and the middle



365 Holocene was generally warmer than the early Holocene (Ning et al., 2019; Tian et al.,  
366 2019). For example, mean annual temperatures were 1.3 °C higher between 7.6 and  
367 5.5 cal ka BP than during 9.4-7.6 cal ka BP as inferred from the branched GDGT  
368 record from Lake Ximenglongtan in southwest China (Fig. 5d, Ning et al., 2019).  
369 Furthermore, the July temperature derived from the chironomid record from Lake  
370 Tiancai and the pollen record from Lake Xingyun also show similar values during the  
371 YD cold event with that of the present-day (Fig. 5b and c, Wu et al., 2018; Zhang et  
372 al., 2019). The pollen record from Lake Xingyun in southwest China suggested that  
373 the July temperatures remained high values at ~25.5 °C during 8.0-5.5 cal ka BP, and  
374 ~1.6 °C higher than those during the early Holocene (Wu et al., 2018). However, July  
375 temperatures reconstructed from Lake Tiancai in southwest China display much lower  
376 amplitude of change, being only 0.3 °C higher during the mid-Holocene than the early  
377 Holocene (Zhang et al., 2017a).

378 Temperature in areas affected by the East Asian summer monsoon was more  
379 sensitive to high latitude climate change than in the ISM region. The mean annual  
380 temperature was ~8.5 °C cooler than present day during 12.3-11.3 cal ka BP in  
381 southwest Japan as inferred from the pollen record from Lake Suigetsu, with the  
382 variation larger in winter than summer (Fig. 5f, Nakagawa et al., 2003, 2006). The  
383 mean annual temperature estimated from the branched GDGTs record from the  
384 Shuizhuyang peat bog in southeast China dropped to 10.3 °C during the YD cold  
385 period, ~5.5 °C cooler than present-day (Wang et al., 2017b). In addition, a pollen  
386 record from Lake Sihailongwan in northeast China suggests a cool mixed forest  
387 biome was the dominant vegetation type during the late YD period, leading to the  
388 calculation of a mean July temperature of ~15-16 °C, 5-6 °C cooler than modern July  
389 temperature (Fig. 5e, Stebich et al., 2015). The summer LST of Lake Sihailongwan  
390 reconstructed from long-chain alkenones shows the average temperature was  
391 ~14.2 °C during the YD event, ~4.3 °C cooler than the modern instrumental water  
392 temperature (Sun et al., 2018). Following the YD cold event, the pollen record from  
393 Lake Sihailongwan in northeast China suggests that the July temperatures gradually



394 increased from 18.0 °C at 11.4 cal ka BP to 26.5 °C at 8.1 cal ka BP, and remained at  
395 generally high values (>25.0 °C) during the mid-Holocene (Stebich et al., 2015). The  
396 branched GDGTs record from Gushantu peat bog in northeast China also shows the  
397 highest mean annual temperatures occurred between 8.0 and 6.8 cal ka BP (Zheng et  
398 al., 2018). The regionally warmer mid-Holocene is considered to be related to the  
399 persistence of remnants of the Northern Hemisphere ice-sheets during the early  
400 Holocene, which slowed down the Atlantic Meridional overturning circulation and  
401 enhanced the westerlies, resulting in lower temperatures across the downstream  
402 Eurasian continent (Zhang et al., 2017a; Wu et al., 2018; Ning et al., 2019).

403

## 404 5. Conclusions

405 The record of isoGDGTs in the sediments of Lake Chenghai in southwest China  
406 presented in this study allows us to test the ability of isoGDGT-based proxies in the  
407 ISM region to reconstruct lake-level and temperature during the Pleistocene-Holocene  
408 transition. The lake-level history inferred from %cren shows a relative lowstand of  
409 Lake Chenghai during 15.4-14.4 cal ka BP, corresponding to a period of weakened  
410 ISM during the H1 cold event. The indistinct signal of lake-level variation during the  
411 YD cold event may be due to the %cren proxy not being sensitive to lake-level  
412 change when the lake was relatively full. By contrast, the crenarchaeol'/crenarchaeol  
413 ratios suggest group I.1b Thaumarchaeota being an important source of isoGDGTs  
414 and the lake level was low during the YD cold event. After filtering for the influence  
415 of isoGDGTs derived from soils in the surrounding catchment and methanogens, the  
416 TEX<sub>86</sub> paleothermometry revealed that the LST of Lake Chenghai was similar to the  
417 present-day value during the YD cold event and experienced a substantial warming of  
418 ~4 °C from the early-Holocene to the mid-Holocene. Overall, our results show that  
419 the distribution of isoGDGTs in Lake Chenghai sediments do have potential for  
420 quantitative paleotemperature reconstruction once potential underlying biases are  
421 properly constrained.



422

423 **Data availability.**

424 All data in this study will be made available on request.

425 **Author contributions.**

426 W.S and E.Z designed the study, W.S performed the fieldwork and lab analysis. W.S  
427 and E.Z led the writing of the paper, J.C, J. S, M.I.B, C.Z, Q.J and J.S contributed to  
428 data interpretation and paper writing. All authors contributed to discussions and  
429 writing of the manuscript. The authors declare that they have no competing financial  
430 interests.

431 **Competing interests.**

432 The authors declare that they have no conflict of interest.

433 **Acknowledgments**

434 We thank Dr. R. Chen and D. Ning for field assistance and laboratory analysis. The  
435 research was supported by the found from the program of Global Change and  
436 Mitigation (2016YFA0600502), the National Natural Science Foundation of China  
437 (41702183 and 41572337), and the fund from State Key Laboratory of Lake Science  
438 and Environment (2016SKL003).

439

440 **References**

- 441 Berke, M.A., Johnson, T.C., Werne, J.P., Schouten, S., Sinninghe Damsté J.S.: A  
442 mid-Holocene thermal maximum at the end of the African Humid Period. *Earth*.  
443 *Planet. Sc. Lett.* 351-352, 95-104, DOI: 10.1016/j.epsl.2012.07.008, 2012.
- 444 Blaauw, M., Andres Christen, J.: Flexible paleoclimate age-depth models using an  
445 autoregressive gamma process. *Bayesian. Anal.* 6, 457-474,  
446 DOI: 10.1214/11-BA618, 2011.
- 447 Blaga, C.I., Reichart, G.-J., Heiri, O., Sinninghe Damsté J.S.: Tetraether membrane





- 448 lipid distributions in water-column particulate matter and sediments: a study of  
449 47 European lakes along a north–south transect. *J. Paleolimnol.* 41, 523-540,  
450 DOI: 10.1007/s10933-008-9242-2, 2009.
- 451 Blaga, C.I., Reichart, G.-J., Lotter, A.F., Anselmetti, F.S., Sinninghe Damsté J.S.: A  
452 TEX<sub>86</sub> lake record suggests simultaneous shifts in temperature in Central Europe  
453 and Greenland during the last deglaciation. *Geophys. Res. Lett.* 40, 948-953,  
454 DOI: 10.1002/grl.50181, 2013.
- 455 Blaga, C.I., Reichart, G.-J., Vissers, E.W., Lotter, A.F., Anselmetti, F.S., Sinninghe  
456 Damsté J.S.: Seasonal changes in glycerol dialkyl glycerol tetraether  
457 concentrations and fluxes in a perialpine lake: Implications for the use of the  
458 TEX<sub>86</sub> and BIT proxies. *Geochim. Cosmochim. Ac.* 75, 6416-6428, DOI:  
459 10.1016/j.gca.2011.08.016, 2011.
- 460 Blaga, C.I., Reichart, G.J., Schouten, S., Lotter, A.F., Werne, J.P., Kosten, S., Mazzeo,  
461 N., Lacerot, G., Damste, J.S.S.: Branched glycerol dialkyl glycerol tetraethers in  
462 lake sediments: Can they be used as temperature and pH proxies? *Org. Geochem.*  
463 41, 1225-1234, DOI: 10.1016/j.orggeochem.2010.07.002, 2010.
- 464 Buckles, L.K., Villanueva, L., Weijers, J.W.H., Verschuren, D., Damsté J.S.S.:  
465 Linking isoprenoidal GDGT membrane lipid distributions with gene abundances  
466 of ammonia-oxidizing Thaumarchaeota and uncultured crenarchaeotal groups in  
467 the water column of a tropical lake (Lake Challa, East Africa). *Environ.l*  
468 *Microbiol.* 15, 2445-2462, DOI: 10.1111/1462-2920.12118, 2013.
- 469 Castañeda, I.S., Schouten, S.: A review of molecular organic proxies for examining  
470 modern and ancient lacustrine environments. *Quaternary. Sci. Rev.* 30,  
471 2851-2891, DOI: 10.1016/j.quascirev.2011.07.009, 2011.
- 472 Castañeda, I.S., Schouten, S.: Corrigendum to “A review of molecular organic proxies  
473 for examining modern and ancient lacustrine environments” [*Quat. Sci. Rev.* 30  
474 (2011) 2851–2891]. *Quaternary. Sci. Rev.* 125, 174-176, DOI:  
475 10.1016/j.quascirev.2015.07.020, 2015.
- 476 Cheng, H., Sinha, A., Wang, X., Cruz, F.W., Edwards, R.L.: The Global  
477 Paleomonsoon as seen through speleothem records from Asia and the Americas.



- 478 Clim. Dynam. 39, 1045-1062, DOI: 10.1007/s00382-012-1363-7, 2012.
- 479 Contreras-Rosales, L.A., Jennerjahn, T., Tharammal, T., Meyer, V., Lückge, A., Paul,  
480 A., Schefuß E.: Evolution of the Indian Summer Monsoon and terrestrial  
481 vegetation in the Bengal region during the past 18 ka. Quaternary. Sci. Rev. 102,  
482 133-148, DOI: 10.1016/j.quascirev.2014.08.010, 2014.
- 483 Dang, X., Ding, W., Yang, H., Pancost, R.D., Naafs, B.D.A., Xue, J., Lin, X., Lu, J.,  
484 Xie, S.: Different temperature dependence of the bacterial brGDGT isomers in  
485 35 Chinese lake sediments compared to that in soils. Org. Geochem., DOI:  
486 10.1016/j.orggeochem.2018.02.008, 2018.
- 487 Dang, X.Y., Xue, J.T., Yang, H., Xie, S.C.: Environmental impacts on the distribution  
488 of microbial tetraether lipids in Chinese lakes with contrasting pH: Implications  
489 for lacustrine paleoenvironmental reconstructions. Sci. China. Earth. Sci. 59,  
490 939-950, DOI: 10.1007/s11430-015-5234-z, 2016.
- 491 Dutt, S., Gupta, A.K., Clemens, S.C., Cheng, H., Singh, R.K., Kathayat, G., Edwards,  
492 R.L.: Abrupt changes in Indian summer monsoon strength during 33,800 to  
493 5500 years B.P. Geophys. Res. Lett. 42, 5526-5532, DOI:  
494 10.1002/2015GL064015, 2015.
- 495 Dykoski, C.A., Edwards, R.L., Cheng, H., Yuan, D., Cai, Y., Zhang, M., Lin, Y., Qing,  
496 J., An, Z., Revenaugh, J.: A high-resolution, absolute-dated Holocene and  
497 deglacial Asian monsoon record from Dongge Cave, China. Earth. Planet. Sc.  
498 Lett. 233, 71-86, DOI: 10.1016/j.epsl.2005.01.036, 2005.
- 499 Filippi, M.L., Talbot, M.R.: The palaeolimnology of northern Lake Malawi over the  
500 last 25 ka based upon the elemental and stable isotopic composition of  
501 sedimentary organic matter. Quaternary. Sci. Rev. 24, 1303-1328, DOI:  
502 10.1016/j.quascirev.2004.10.009, 2005.
- 503 Govil, P., Divakar Naidu, P.: Variations of Indian monsoon precipitation during the  
504 last 32 kyr reflected in the surface hydrography of the Western Bay of Bengal.  
505 Quaternary. Sci. Rev. 30, 3871-3879, DOI: 10.1016/j.quascirev.2011.10.004,  
506 2011.
- 507 Hopmans, E.C., Weijers, J.W.H., Schefuss, E., Herfort, L., Damste, J.S.S., Schouten,



- 508 S.: A novel proxy for terrestrial organic matter in sediments based on branched  
509 and isoprenoid tetraether lipids. *Earth. Planet. Sc. Lett.* 224, 107-116, DOI:  
510 10.1016/j.epsl.2004.05.012, 2004
- 511 Hu, J., Zhou, H., Peng, P.a., Spiro, B.: Seasonal variability in concentrations and  
512 fluxes of glycerol dialkyl glycerol tetraethers in Huguangyan Maar Lake, SE  
513 China: Implications for the applicability of the MBT-CBT paleotemperature  
514 proxy in lacustrine settings. *Chem. Geol.* 420, 200-212, DOI:  
515 10.1016/j.chemgeo.2015.11.008, 2016.
- 516 Kathayat, G., Cheng, H., Sinha, A., Spätl, C., Edwards, R.L., Zhang, H., Li, X., Yi, L.,  
517 Ning, Y., Cai, Y., Lui, W.L., Breitenbach, S.F.M.: Indian monsoon variability on  
518 millennial-orbital timescales. *Sci. Rep-UK.* 6, DOI: 10.1038/srep24374, 2016.
- 519 Kim, J.-G., Jung, M.-Y., Park, S.-J., Rijpstra, W.I.C., Sinninghe Damst é J.S., Madsen,  
520 E.L., Min, D., Kim, J.-S., Kim, G.-J., Rhee, S.-K.: Cultivation of a highly  
521 enriched ammonia-oxidizing archaeon of thaumarchaeotal group I.1b from an  
522 agricultural soil. *Environ. Microbiol.* 14, 1528-1543, DOI:  
523 10.1111/j.1462-2920.2012.02740.x, 2012.
- 524 Kim, J.-H., van der Meer, J., Schouten, S., Helmke, P., Willmott, V., Sangiorgi, F.,  
525 Ko ç N., Hopmans, E.C., Damst é J.S.S.: New indices and calibrations derived  
526 from the distribution of crenarchaeal isoprenoid tetraether lipids: Implications for  
527 past sea surface temperature reconstructions. *Geochim. Cosmochim. Ac.* 74,  
528 4639-4654, DOI: 10.1016/j.gca.2010.05.027, 2010.
- 529 Li, Y., Chen, X., Xiao, X., Zhang, H., Xue, B., Shen, J., Zhang, E.: Diatom-based  
530 inference of Asian monsoon precipitation from a volcanic lake in southwest  
531 China for the last 18.5 ka. *Quaternary. Sci. Rev.* 182, 109-120, DOI:  
532 10.1016/j.quascirev.2017.11.021, 2018.
- 533 Ljungqvist, F.C., Krusic, P.J., Sundqvist, H.S., Zorita, E., Brattström, G., Frank, D.:  
534 Northern Hemisphere hydroclimate variability over the past twelve centuries.  
535 *Nature* 532, 94-98, DOI: 10.1038/nature17418, 2016.
- 536 Lü J., Ju, J., Ren, J., Gan, W.: The influence of the Madden-Julian Oscillation activity  
537 anomalies on Yunnan's extreme drought of 2009–2010. *Sci. China. Earth. Sci.* 55,



- 538 98-112, DOI: 10.1007/s11430-011-4348-1, 2012.
- 539 Meegan Kumar, D., Woltering, M., Hopmans, E.C., Sinninghe Damsté J.S., Schouten,  
540 S., Werne, J.P.: The vertical distribution of Thaumarchaeota in the water column  
541 of Lake Malawi inferred from core and intact polar tetraether lipids. *Org.*  
542 *Geochem.* 132, 37-49, DOI: 10.1016/j.orggeochem.2019.03.004, 2019.
- 543 Nakagawa, T., Kitagawa, H., Yasuda, Y., Tarasov, P.E., Nishida, K., Gotanda, K.,  
544 Sawai, Y.: Asynchronous Climate Changes in the North Atlantic and Japan  
545 During the Last Termination. *Science* 299, 688-691, DOI:  
546 10.1126/science.1078235, 2003.
- 547 Nakagawa, T., Tarasov, P.E., Kitagawa, H., Yasuda, Y., Gotanda, K.: Seasonally  
548 specific responses of the East Asian monsoon to deglacial climate changes.  
549 *Geology* 34, 521-524, DOI: 10.1130/G217641, 2006.
- 550 Ning, D., Zhang, E., Shulmeister, J., Chang, J., Sun, W., Ni, Z.: Holocene mean  
551 annual air temperature (MAAT) reconstruction based on branched glycerol  
552 dialkyl glycerol tetraethers from Lake Ximenglongtan, southwestern China. *Org.*  
553 *Geochem.* 133, 65-76, DOI: 10.1016/j.orggeochem.2019.05.003, 2019.
- 554 Pearson, E.J., Juggins, S., Talbot, H.M., Weckstrom, J., Rosen, P., Ryves, D.B.,  
555 Roberts, S.J., Schmidt, R.: A lacustrine GDGT-temperature calibration from the  
556 Scandinavian Arctic to Antarctic: Renewed potential for the application of  
557 GDGT-paleothermometry in lakes. *Geochim. Cosmochim. Ac.* 75, 6225-6238,  
558 DOI: 10.1016/j.gca.2011.07.042, 2011.
- 559 Pitcher, A., Hopmans, E.C., Mosier, A.C., Park, S.-J., Rhee, S.-K., Francis, C.A.,  
560 Schouten, S., Sinninghe Damsté J.S.: Core and Intact Polar Glycerol  
561 Dibiphytanyl Glycerol Tetraether Lipids of Ammonia-Oxidizing Archaea  
562 Enriched from Marine and Estuarine Sediments. *Appl. Environ. Microb.* 77,  
563 3468, DOI: 10.1128/AEM.02758-10, 2011.
- 564 Powers, L., Werne, J.P., Vanderwoude, A.J., Sinninghe Damsté J.S., Hopmans, E.C.,  
565 Schouten, S.: Applicability and calibration of the TEX<sub>86</sub> paleothermometer in  
566 lakes. *Org. Geochem.* 41, 404-413, DOI: 10.1016/j.orggeochem.2009.11.009,  
567 2010.



- 568 Powers, L.A., Werne, J.P., Johnson, T.C., Hopmans, E.C., Damsté, J.S.S., Schouten, S.:  
569 Crenarchaeotal membrane lipids in lake sediments: A new paleotemperature  
570 proxy for continental paleoclimate reconstruction? *Geology* 32, 613-616, DOI:  
571 10.1130/G20434.1, 2004.
- 572 R Development Core Team, 2013. R: A language and environment for statistical  
573 computing, R Foundation for Statistical Computing, Vienna, Austria.
- 574 Rashid, H., Flower, B.P., Poore, R.Z., Quinn, T.M.: A ~25 ka Indian Ocean monsoon  
575 variability record from the Andaman Sea. *Quaternary. Sci. Rev.* 26, 2586-2597,  
576 DOI: 10.1016/j.quascirev.2007.07.002, 2007.
- 577 Reimer, P.J., Bard, E., Bayliss, A., Beck, J.W., Blackwell, P.G., Ramsey, C.B., Buck,  
578 C.E., Cheng, H., Edwards, R.L., Friedrich, M.: IntCal13 and Marine13  
579 radiocarbon age calibration curves 0–50,000 years cal BP. *Radiocarbon* 55,  
580 1869-1887, DOI: 10.2458/azu\_js\_rc.55.16947, 2013.
- 581 Russell, J.M., Hopmans, E.C., Loomis, S.E., Liang, J., Sinninghe Damsté J.S.:  
582 Distributions of 5- and 6-methyl branched glycerol dialkyl glycerol tetraethers  
583 (brGDGTs) in East African lake sediment: Effects of temperature, pH, and new  
584 lacustrine paleotemperature calibrations. *Org. Geochem.* 117, 56-69, DOI:  
585 10.1016/j.orggeochem.2017.12.003, 2018.
- 586 Saraswat, R., Lea, D.W., Nigam, R., Mackensen, A., Naik, D.K.: Deglaciation in the  
587 tropical Indian Ocean driven by interplay between the regional monsoon and  
588 global teleconnections. *Earth. Planet. Sc. Lett.* 375, 166-175, DOI:  
589 10.1016/j.epsl.2013.05.022, 2013.
- 590 Schouten, S., Hopmans, E.C., Schefuß E., Sinninghe Damsté J.S.: Distributional  
591 variations in marine crenarchaeotal membrane lipids: a new tool for  
592 reconstructing ancient sea water temperatures? *Earth. Planet. Sc. Lett.* 204,  
593 265-274, DOI: 10.1016/S0012-821X(02)00979-2, 2002.
- 594 Schouten, S., Hopmans, E.C., Sinninghe Damsté J.S.: The organic geochemistry of  
595 glycerol dialkyl glycerol tetraether lipids: A review. *Org. Geochem.* 54, 19-61,  
596 DOI: 10.1016/j.orggeochem.2012.09.006, 2013.
- 597 Schouten, S., Rijpstra, W.I.C., Durisch-Kaiser, E., Schubert, C.J., Sinninghe Damsté



- 598 J.S.: Distribution of glycerol dialkyl glycerol tetraether lipids in the water  
599 column of Lake Tanganyika. *Org. Geochem.* 53, 34-37, DOI:  
600 10.1016/j.orggeochem.2012.01.009, 2012.
- 601 Sinha, A., Kathayat, G., Cheng, H., Breitenbach, S.F.M., Berkelhammer, M.,  
602 Mudelsee, M., Biswas, J., Edwards, R.L.: Trends and oscillations in the Indian  
603 summer monsoon rainfall over the last two millennia. *Nat. Commun.* 6, DOI:  
604 10.1038/ncomms7309, 2015.
- 605 Sinha, A., Stott, L., Berkelhammer, M., Cheng, H., Edwards, R.L., Buckley, B.,  
606 Aldenderfer, M., Mudelsee, M.: A global context for megadroughts in monsoon  
607 Asia during the past millennium. *Quaternary. Sci. Rev.* 30, 47-62, DOI:  
608 10.1016/j.quascirev.2010.10.005, 2011.
- 609 Sinninghe Damsté J.S., Ossebaar, J., Abbas, B., Schouten, S., Verschuren, D.: Fluxes  
610 and distribution of tetraether lipids in an equatorial African lake: Constraints on  
611 the application of the TEX<sub>86</sub> palaeothermometer and BIT index in lacustrine  
612 settings. *Geochim. Cosmochim. Ac.* 73, 4232-4249, DOI:  
613 10.1016/j.gca.2009.04.022, 2009.
- 614 Sinninghe Damsté J.S., Ossebaar, J., Schouten, S., Verschuren, D.: Distribution of  
615 tetraether lipids in the 25-ka sedimentary record of Lake Challa: extracting  
616 reliable TEX<sub>86</sub> and MBT/CBT palaeotemperatures from an equatorial African  
617 lake. *Quaternary. Sci. Rev.* 50, 43-54, DOI: 10.1016/j.quascirev.2012.07.001,  
618 2012a.
- 619 Sinninghe Damsté J.S., Rijpstra, W.I.C., Hopmans, E.C., Jung, M.-Y., Kim, J.-G.,  
620 Rhee, S.-K., Stieglmeier, M., Schleper, C.: Intact Polar and Core Glycerol  
621 Dibiphytanyl Glycerol Tetraether Lipids of Group I.1a and I.1b *Thaumarchaeota*  
622 in Soil. *Appl. Environ Microb* 78, 6866-6874, DOI: 10.1128/AEM.01681-12,  
623 2012b.
- 624 Stebich, M., Rehfeld, K., Schlütz, F., Tarasov, P.E., Liu, J., Mingram, J.: Holocene  
625 vegetation and climate dynamics of NE China based on the pollen record from  
626 Sihailongwan Maar Lake. *Quaternary. Sci. Rev.* 124, 275-289, DOI:  
627 10.1016/j.quascirev.2015.07.021, 2015.



- 628 Sun, Q., Chu, G., Xie, M., Ling, Y., Su, Y., Zhu, Q., Shan, Y., Liu, J.: Long-chain  
629 alkenone-inferred temperatures from the last deglaciation to the early Holocene  
630 recorded by annually laminated sediments of the maar lake Sihailongwan,  
631 northeastern China. *Holocene* 28, 1173-1180, DOI: 10.1177/0959683618761546,  
632 2018.
- 633 Sun, W., Zhang, E., Shulmeister, J., Bird, M.I., Chang, J., Shen, J.: Abrupt changes in  
634 Indian summer monsoon strength during the last deglaciation and early Holocene  
635 based on stable isotope evidence from Lake Chenghai, southwest China.  
636 *Quaternary. Sci. Rev.* 218, 1-9, DOI: 10.1016/j.quascirev.2019.06.006, 2019.
- 637 Tian, L., Wang, M., Zhang, X., Yang, X., Zong, Y., Jia, G., Zheng, Z., Man, M.:  
638 Synchronous change of temperature and moisture over the past 50 ka in  
639 subtropical southwest China as indicated by biomarker records in a crater lake.  
640 *Quaternary. Sci. Rev.* 212, 121-134, DOI: 10.1016/j.quascirev.2019.04.003,  
641 2019.
- 642 Tierney, J.E., Russell, J.M., Huang, Y., Damsté J.S.S., Hopmans, E.C., Cohen, A.S.:  
643 Northern Hemisphere controls on tropical southeast African climate during the  
644 past 60,000 years. *Science* 322, 252-255, DOI: 10.1126/science.1160485, 2008.
- 645 Tierney, J.E., Russell, J.M., Eggermont, H., Hopmans, E.C., Verschuren, D., Damste,  
646 J.S.S.: Environmental controls on branched tetraether lipid distributions in  
647 tropical East African lake sediments. *Geochim. Cosmochim. Ac.* 74, 4902-4918,  
648 DOI: 10.1016/j.gca.2010.06.002, 2010.
- 649 Wan, G.J., Chen, J.A., Wu, F.C., Xu, S.Q., Bai, Z.G., Wan, E.Y., Wang, C.S., Huang,  
650 R.G., Yeager, K.M., Santschi, P.H.: Coupling between  $^{210}\text{Pb}_{\text{ex}}$  and organic matter  
651 in sediments of a nutrient-enriched lake: An example from Lake Chenghai, China.  
652 *Chem Geol* 224, 223-236, DOI: 10.1016/j.chemgeo.2005.07.025, 2005.
- 653 Wang, H., Dong, H., Zhang, C.L., Jiang, H., Liu, Z., Zhao, M., Liu, W.: Deglacial and  
654 Holocene archaeal lipid-inferred paleohydrology and paleotemperature history of  
655 Lake Qinghai, northeastern Qinghai-Tibetan Plateau. *Quaternary. Res.* 83,  
656 116-126, DOI: 10.1016/j.yqres.2014.10.003, 2015.
- 657 Wang, H., Dong, H., Zhang, C.L., Jiang, H., Zhao, M., Liu, Z., Lai, Z., Liu, W.: Water



- 658 depth affecting thaumarchaeol production in Lake Qinghai, northeastern  
659 Qinghai–Tibetan plateau: Implications for paleo lake levels and paleoclimate.  
660 Chem. Geol. 368, 76-84, DOI: 10.1016/j.chemgeo.2014.01.009, 2014a.
- 661 Wang, H., He, Y., Liu, W., Zhou, A., Kolpakova, M., Krivonogov, S., Liu, Z.: Lake  
662 Water Depth Controlling Archaeal Tetraether Distributions in Midlatitude Asia:  
663 Implications for Paleo Lake-Level Reconstruction. Geophys. Res. Lett. 46,  
664 5274-5283, DOI: 10.1029/2019GL082157, 2019.
- 665 Wang, H., Leng, Q., Liu, W., Yang, H.: A rapid lake-shallowing event terminated  
666 preservation of the Miocene Clarkia Fossil Konservat-Lagerstätte (Idaho, USA).  
667 Geology 45, 239-242, DOI: 10.1130/G38434.1, 2017a.
- 668 Wang, M., Zheng, Z., Man, M., Hu, J., Gao, Q.: Branched GDGT-based  
669 paleotemperature reconstruction of the last 30,000 years in humid monsoon  
670 region of Southeast China. Chem. Geol. 463, 94-102, DOI:  
671 10.1016/j.chemgeo.2017.05.014, 2017b.
- 672 Wang, Q., Yang, X., Anderson, N.J., Zhang, E., Li, Y.: Diatom response to climate  
673 forcing of a deep, alpine lake (Lugu Hu, Yunnan, SW China) during the Last  
674 Glacial Maximum and its implications for understanding regional monsoon  
675 variability. Quaternary. Sci. Rev. 86, 1-12, DOI: 10.1016/j.quascirev.2013.12.024,  
676 2014b.
- 677 Wang, S., Dou, H., 1998. Lakes in China. Science Press, Beijing, China (in Chinese).
- 678 Weijers, J.W.H., Schouten, S., Spaargaren, O.C., Damste, J.S.S.: Occurrence and  
679 distribution of tetraether membrane lipids in soils: Implications for the use of the  
680 TEX<sub>86</sub> proxy and the BIT index. Org. Geochem. 37, 1680-1693, DOI:  
681 10.1016/j.orggeochem.2006.07.018, 2006.
- 682 Wu, D., Chen, X., Lv, F., Brenner, M., Curtis, J., Zhou, A., Chen, J., Abbott, M., Yu, J.,  
683 Chen, F.: Decoupled early Holocene summer temperature and monsoon  
684 precipitation in southwest China. Quaternary. Sci. Rev. 193, 54-67, DOI:  
685 10.1016/j.quascirev.2018.05.038, 2018.
- 686 Wu, D., Zhou, A., Chen, X., Yu, J., Zhang, J., Sun, H.: Hydrological and ecosystem  
687 response to abrupt changes in the Indian monsoon during the last glacial, as





688 recorded by sediments from Xingyun Lake, Yunnan, China. *Palaeogeogr.*  
689 *Palaeocl.* 421, 15-23, DOI: 10.1016/j.palaeo.2015.01.005, 2015.

690 Wu, J., Gagan, M.K., Jiang, X., Xia, W., Wang, S.: Sedimentary geochemical  
691 evidence for recent eutrophication of Lake Chenghai, Yunnan, China. *J.*  
692 *Paleolimnol.* 32, 85-94, 2004.

693 Yao, Y., Zhao, J., Bauersachs, T., Huang, Y.: Effect of water depth on the TEX<sub>86</sub> proxy  
694 in volcanic lakes of northeastern China. *Org. Geochem.* 129, 88-98, DOI:  
695 10.1016/j.orggeochem.2019.01.014, 2019.

696 Zhang, E., Chang, J., Cao, Y., Sun, W., Shulmeister, J., Tang, H., Langdon, P.G., Yang,  
697 X., Shen, J.: Holocene high-resolution quantitative summer temperature  
698 reconstruction based on subfossil chironomids from the southeast margin of the  
699 Qinghai-Tibetan Plateau. *Quaternary. Sci. Rev.* 165, 1-12, DOI:  
700 10.1016/j.quascirev.2017.04.008, 2017a.

701 Zhang, E., Chang, J., Shulmeister, J., Langdon, P., Sun, W., Cao, Y., Yang, X., Shen, J.:  
702 Summer temperature fluctuations in Southwestern China during the end of the  
703 LGM and the last deglaciation. *Earth. Planet. Sc. Lett.* 509, 78-87, DOI:  
704 10.1016/j.epsl.2018.12.024, 2019.

705 Zhang, E., Sun, W., Chang, J., Ning, D., Shulmeister, J.: Variations of the Indian  
706 summer monsoon over the last 30 000 years inferred from a pyrogenic carbon  
707 record from south-west China. *J. Quaternary. Sci.* 33, 131-138, DOI:  
708 10.1002/jqs.3008, 2018.

709 Zhang, E., Zhao, C., Xue, B., Liu, Z., Yu, Z., Chen, R., Shen, J.: Millennial-scale  
710 hydroclimate variations in southwest China linked to tropical Indian Ocean since  
711 the Last Glacial Maximum. *Geology* 45, 435-438, DOI: 10.1130/G38309.1,  
712 2017b.

713 Zheng, Y., Pancost, R.D., Naafs, B.D.A., Li, Q., Liu, Z., Yang, H.: Transition from a  
714 warm and dry to a cold and wet climate in NE China across the Holocene. *Earth.*  
715 *Planet. Sc. Lett.* 493, 36-46, DOI: 10.1016/j.epsl.2018.04.019, 2018.

716



717 **Figure captions**

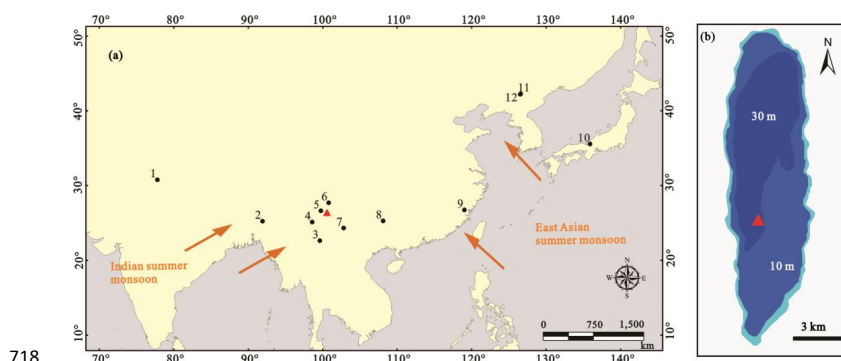

718

719 **Fig. 1.** (a) Map showing the location of Lake Chenghai in southwest China (triangle)  
720 and other sites (circles) mentioned in the text: 1. Bittoo Cave (Kathayat et al., 2016); 2.  
721 Mawmluh Cave (Dutt et al., 2015); 3. Lake Ximenglongtan (Ning et al., 2019); 4.  
722 Lake Tengchongqinghai (Zhang et al., 2017b; Li et al., 2018; Tian et al., 2019); 5.  
723 Lake Tiancai (Zhang et al., 2017a, 2019); 6. Lake Lugu (Wang et al., 2014); 7. Lake  
724 Xingyun (Wu et al., 2015, 2018); 8. Dongge Cave (Dykoski et al., 2005); 9. Peat bog  
725 Shuizhuyang (Wang et al., 2017b); 10. Lake Suigetsu (Nakagawa et al., 2003, 2006);  
726 11. Lake Sihailongwan (Stebich et al., 2015; Sun et al., 2018), 12. Gushantun peat bog  
727 (Zheng et al., 2018). Arrows indicate the dominant atmospheric circulation systems in  
728 the region. (b) The triangle in panel b indicates the location of core CH2016 in Lake  
729 Chenghai.

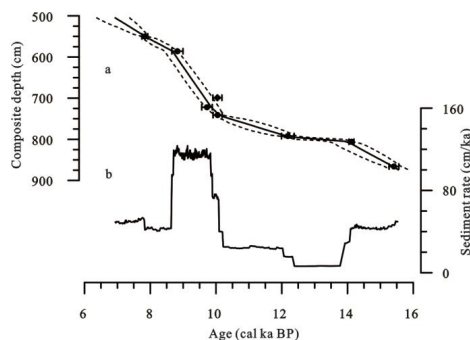

730



731 **Fig. 2.** (a) Age-depth model of the Lake Chenghai sediment core produced by Bacon  
732 software (Blaauw and Andres Christen, 2011; Sun et al., 2019). Dotted lines indicate  
733 the 95% confidence range and the solid line indicates the weighted mean ages for  
734 each depth, error bars indicate the standard deviation range ( $2\sigma$ ) of the calibrated  
735 radiocarbon dates. (b) estimated sedimentation rate (Sun et al., 2019).

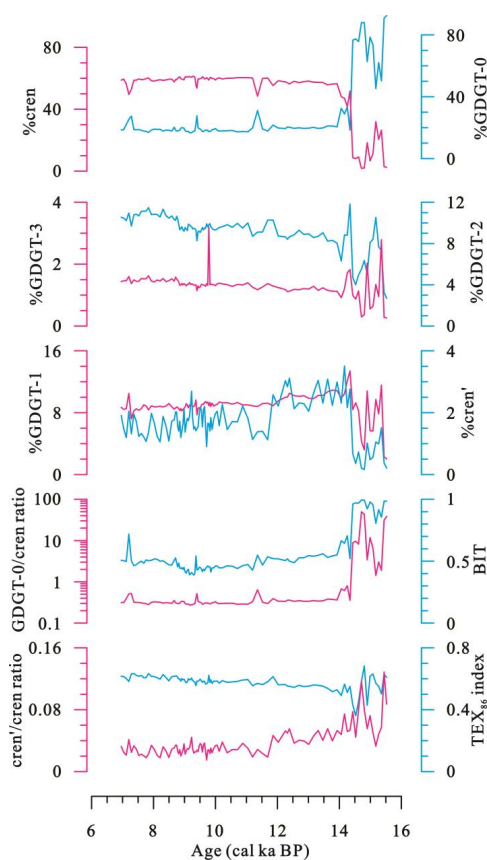

736

737 **Fig. 3.** Variations in the relative isoGDGT distribution and isoGDGTs-based proxies  
738 of the Lake Chenghai sediments.

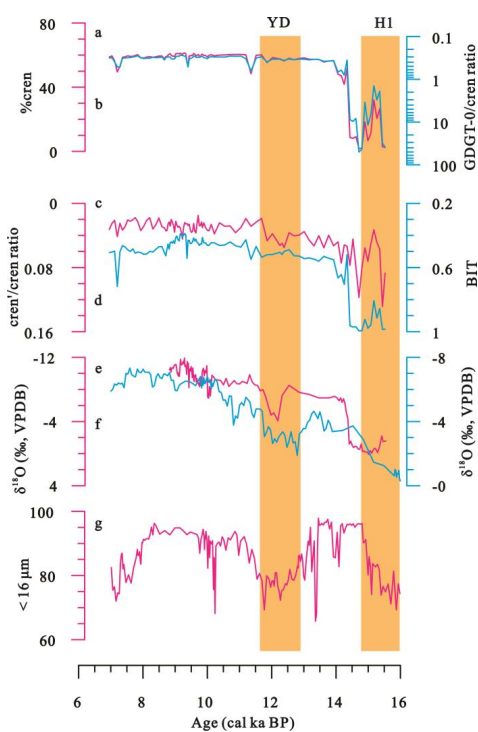

739

740 **Fig. 4.** Comparison of the isoGDGT-based lake-level record from Lake Chenghai (a-d)  
741 with the  $\delta^{18}\text{O}$  record of carbonate finer in grain size than  $63\ \mu\text{m}$  from Lake Chenghai  
742 (e, Sun et al., 2019), the stalagmite  $\delta^{18}\text{O}$  records from Mawmluh Cave in northeast  
743 Indian (f, Dutt et al., 2015); and grain-size record from Lake Tengchongqinghai (g,  
744 Zhang et al., 2017). The shading is utilised to represent ‘cold’ events in the North  
745 Atlantic.

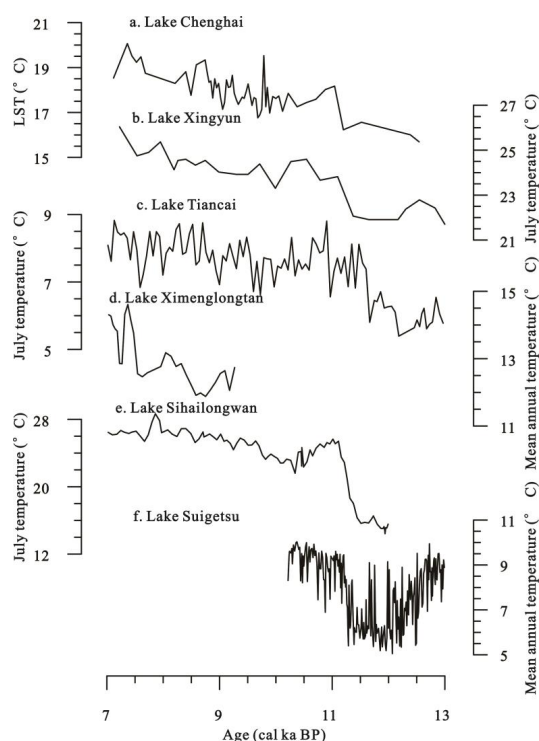

746

747 **Fig. 5.** A comparison of TEX<sub>86</sub>-based lake surface temperature of Lake Chenghai (a)  
748 with other paleotemperature records. July temperature reconstructed from pollen  
749 record from Lake Xingyun (b, Wu et al., 2018) and subfossil chironomids from Lake  
750 Tiancai (c, Zhang et al., 2017a, 2019); mean annual temperature reconstructed from  
751 Lake Ximenglongtan based on brGDGTs (d, Ning et al., 2019); July temperature  
752 reconstructed from pollen record from Lake Sihailongwan (e, Stebich et al., 2015);  
753 and pollen reconstructed mean annual temperature from Lake Suigetsu (f, Nakagawa  
754 et al., 2003).

755
